# Supplementary material
Source: publisher figshare collection journal article supplement (https://acs.figshare.com/ndownloader/files/10781141)
Supplement: Supplementary file 1 [file 10781141]

## Supporting Information

### Centimeter-Scale, Large-Area, Few-Layer 1T'-WTe<sub>2</sub> Films by Chemical Vapor Deposition and Its Long Term Stability in Ambient Condition

Jie Li,<sup>†</sup> Shuai Cheng,<sup>†</sup> Zhixuan Liu,<sup>†</sup> Wenfeng Zhang,<sup>†,\*</sup> and Haixin Chang<sup>†,\*</sup>

<sup>†</sup>Center for Joining and Electronic Packaging, State Key Laboratory of Material

Processing and Die & Mould Technology, School of Materials Science and

Engineering, Huazhong University of Science and Technology, Wuhan 430074, PRC.

E-mail: [hxchang@hust.edu.cn](mailto:hxchang@hust.edu.cn), [wfzhang@hust.edu.cn](mailto:wfzhang@hust.edu.cn)

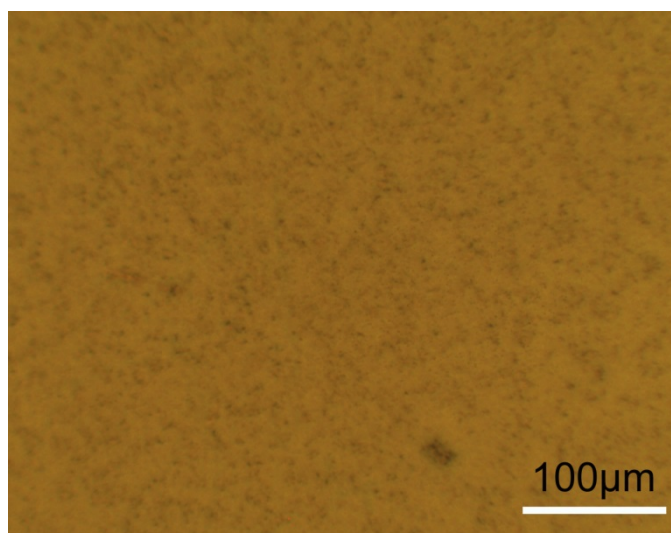

**Figure S1** The optical image of produced WTe<sub>2</sub> film when the substrate is faced up.

a

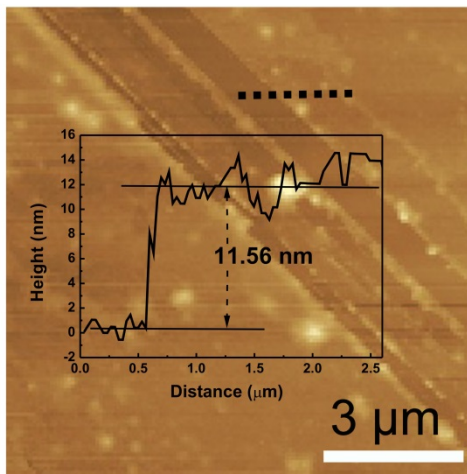

b

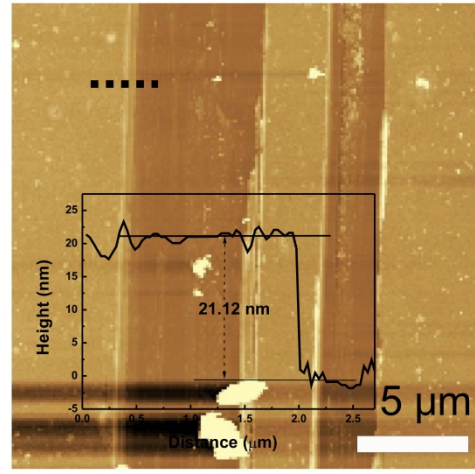

**Figure S2** AFM image from related thicker few-layer WTe<sub>2</sub> samples. The thickness is around a) 11.56 nm, b) 21.12 nm. The thickness of as-grown WTe<sub>2</sub> from ~6 nm to ~20nm.

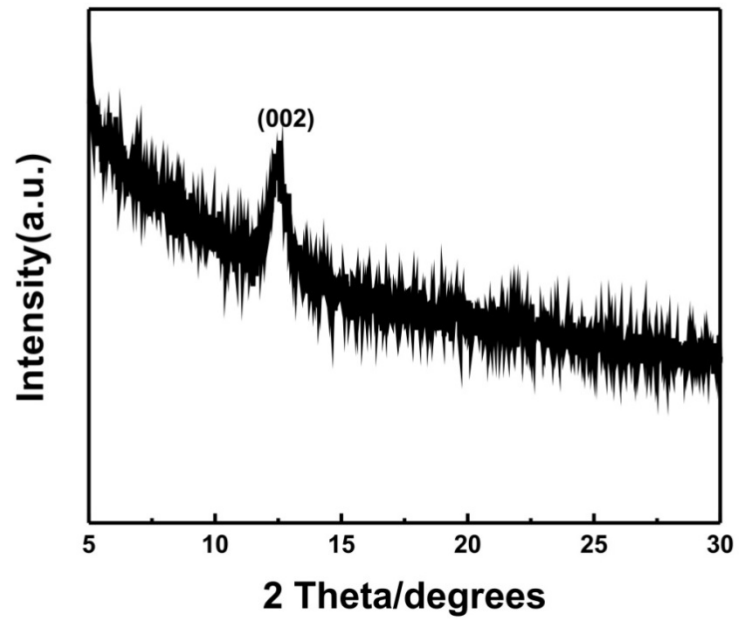

**Figure S3** XRD pattern of few-layer  $\text{WTe}_2$ . The pattern shows one only diffraction peak at  $\sim 12.5^\circ$  for  $2\theta$  from the (002) plane, indicating a c-axis orientation.

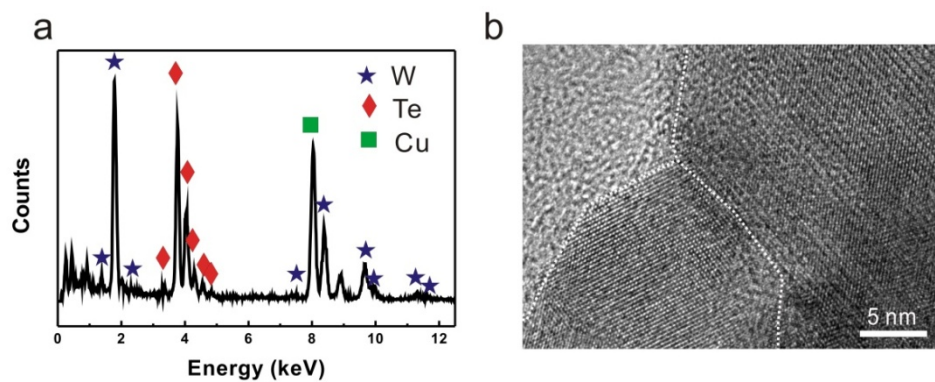

**Figure S4** a) the energy-dispersive X-ray spectroscopy of prepared  $WTe_2$ . b) HRTEM image of  $WTe_2$ , grain boundaries are plotted with white dash lines.

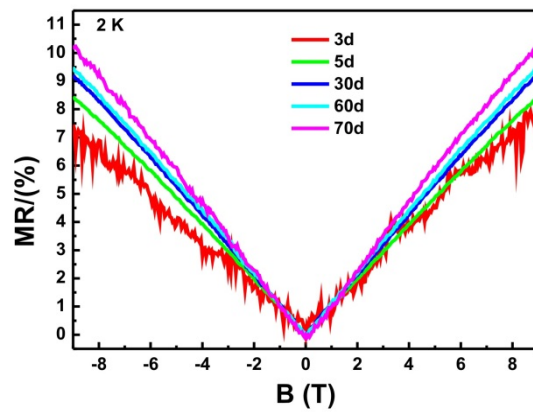

**Figure S5** Exposure time dependent MRs for the relatively thicker WTe<sub>2</sub> sample under 2K.
